# Supplementary material
Source: Royal Society of Chemistry journal article supplement (doi:10.1039/d6fo01526c)
Supplement: d6fo01526c1.xlsx [file d6fo01526c1.xlsx]

## Sheet: Nutritional composition
Sample	Moisture (g)	Fat (g)	Protein (g)	Carbohydrates (g)	Sugars (g)	Ash (g)	Salt (g)	Dietary fibre (g)
M	24.9	18.7	9.6	42.8	24	1.5	0.57	2.6
M	24.5	17.8	9.7	43.9	24.2	1.6	0.56	2.6
MM	24.9	18.9	11.7	39.8	24.1	1.8	0.58	2.9
MM	24.8	18.6	11.8	40.1	24	1.8	0.59	2.9

## Sheet: Mechanical properties muffins
Sample	Hardness (N)	Cohesiveness (%)	Elasticity (%)	Chewiness (N)
M	8.37795	0.624705	0.842344	4.40861
M	7.5068	0.575853	0.784107	3.38955
M	7.87699	0.618099	0.78819	3.83751
M	9.5489	0.643162	0.823495	5.05749
M	8.08043	0.630476	0.843373	4.29658
M	9.47548	0.623156	0.825031	4.87156
M	8.8965	0.628723	0.839265	4.69438
M	7.45021	0.630757	0.855911	4.02216
M	7.87316	0.620544	0.804254	3.9293
MM	12.6205	0.517347	0.753189	4.91769
MM	16.2863	0.564183	0.846141	7.77472
MM	14.2977	0.599243	0.833955	7.14517
MM	12.1769	0.495103	0.791464	4.77157
MM	11.2537	0.482836	0.822708	4.47035
MM	13.5673	0.556167	0.83819	6.32472
MM	17.3433	0.507402	0.846967	7.45332
MM	15.793	0.572063	0.835823	7.55131

## Sheet: Oral processing in vivo
Sample	Volunteer	nº cycles		Sample	Chewing	Mesh size (mm)	Cumulative weight of particles (%)		Sample	Chewing	d50 (mm)
M	1	14		M	NC	7.1	92.4475		M	NC	4.1
M	1	14		M	NC	7.1	100		M	NC	3.2
M	2	12		M	NC	7.1	92.0163		M	NC	3.8
M	2	13		M	NC	7.1	99.5118		M	NC	3
M	3	14		M	NC	7.1	100		M	NC	3
M	3	11		M	NC	7.1	87.3622		M	NC	4.8
M	4	16		M	NC	7.1	87.2213		M	NC	3.9
M	4	16		M	NC	7.1	95.5474		M	NC	3.7
MM	1	17		M	NC	6.3	86.8066		MM	NC	4.3
MM	1	16		M	NC	6.3	95.5371		MM	NC	4.4
MM	2	13		M	NC	6.3	87.6268		MM	NC	5.5
MM	2	14		M	NC	6.3	93.0275		MM	NC	3.9
MM	3	18		M	NC	6.3	100		MM	NC	4
MM	3	16		M	NC	6.3	80.0396		MM	NC	4.8
MM	4	21		M	NC	6.3	86.1532		MM	NC	4.5
MM	4	17		M	NC	6.3	95.5474		MM	NC	4.7
				M	NC	4	47.5179
				M	NC	4	68.6812
				M	NC	4	53.0557
				M	NC	4	73.3611
				M	NC	4	73.8204
				M	NC	4	32.5037
				M	NC	4	52.4308
				M	NC	4	57.1844
				M	NC	2.5	26.1595
				M	NC	2.5	33.1355
				M	NC	2.5	21.7282
				M	NC	2.5	38.0918
				M	NC	2.5	35.6782
				M	NC	2.5	9.84293
				M	NC	2.5	15.449
				M	NC	2.5	19.7457
				M	NC	2	19.022
				M	NC	2	25.5757
				M	NC	2	15.2599
				M	NC	2	30.6159
				M	NC	2	25.5082
				M	NC	2	5.56281
				M	NC	2	10.9343
				M	NC	2	10.7486
				M	NC	1.4	12.5364
				M	NC	1.4	18.0232
				M	NC	1.4	9.80589
				M	NC	1.4	24.6605
				M	NC	1.4	18.9972
				M	NC	1.4	4.05059
				M	NC	1.4	7.84562
				M	NC	1.4	7.37847
				M	NC	1	6.29785
				M	NC	1	10.7066
				M	NC	1	4.56481
				M	NC	1	8.61008
				M	NC	1	10.7306
				M	NC	1	2.34034
				M	NC	1	2.93454
				M	NC	1	3.66626
				M	NC	0.8	5.75451
				M	NC	0.8	10.02
				M	NC	0.8	4.12023
				M	NC	0.8	8.06082
				M	NC	0.8	9.54786
				M	NC	0.8	2.25033
				M	NC	0.8	2.45554
				M	NC	0.8	3.42627
				M	NC	0.4	1.99555
				M	NC	0.4	4.16965
				M	NC	0.4	1.11459
				M	NC	0.4	2.63948
				M	NC	0.4	3.09228
				M	NC	0.4	0.706602
				M	NC	0.4	0.51203
				M	NC	0.4	0.643382
				M	NC	0.25	0.918745
				M	NC	0.25	2.28866
				M	NC	0.25	0.657483
				M	NC	0.25	1.25108
				M	NC	0.25	0.769989
				M	NC	0.25	0.373554
				M	NC	0.25	0.275285
				M	NC	0.25	0.265523
				M	NC	0	0
				M	NC	0	0
				M	NC	0	0
				M	NC	0	0
				M	NC	0	0
				M	NC	0	0
				M	NC	0	0
				M	NC	0	0
				MM	NC	7.1	84.6636
				MM	NC	7.1	90.9816
				MM	NC	7.1	58.9185
				MM	NC	7.1	73.2594
				MM	NC	7.1	88.3918
				MM	NC	7.1	87.6137
				MM	NC	7.1	100
				MM	NC	7.1	92.1246
				MM	NC	6.3	78.5401
				MM	NC	6.3	79.0732
				MM	NC	6.3	55.1164
				MM	NC	6.3	62.5065
				MM	NC	6.3	83.8133
				MM	NC	6.3	82.975
				MM	NC	6.3	100
				MM	NC	6.3	79.169
				MM	NC	4	45.3761
				MM	NC	4	44.7123
				MM	NC	4	37.7816
				MM	NC	4	50.9028
				MM	NC	4	49.9352
				MM	NC	4	41.6033
				MM	NC	4	35.7952
				MM	NC	4	34.305
				MM	NC	2.5	32.0298
				MM	NC	2.5	33.8191
				MM	NC	2.5	23.6247
				MM	NC	2.5	38.133
				MM	NC	2.5	29.8625
				MM	NC	2.5	10.6995
				MM	NC	2.5	20.8358
				MM	NC	2.5	13.2101
				MM	NC	2	29.8657
				MM	NC	2	28.4193
				MM	NC	2	17.7713
				MM	NC	2	35.7197
				MM	NC	2	23.9587
				MM	NC	2	7.35902
				MM	NC	2	17.6109
				MM	NC	2	8.00907
				MM	NC	1.4	27.0197
				MM	NC	1.4	24.4955
				MM	NC	1.4	13.1994
				MM	NC	1.4	34.1079
				MM	NC	1.4	19.3354
				MM	NC	1.4	5.56061
				MM	NC	1.4	14.3997
				MM	NC	1.4	6.06416
				MM	NC	1	22.4062
				MM	NC	1	16.3926
				MM	NC	1	7.88115
				MM	NC	1	3.05573
				MM	NC	1	11.3591
				MM	NC	1	3.0635
				MM	NC	1	9.78027
				MM	NC	1	3.61345
				MM	NC	0.8	14.7102
				MM	NC	0.8	15.2778
				MM	NC	0.8	7.0691
				MM	NC	0.8	2.76636
				MM	NC	0.8	10.5869
				MM	NC	0.8	2.80718
				MM	NC	0.8	9.30777
				MM	NC	0.8	3.3809
				MM	NC	0.4	6.69404
				MM	NC	0.4	4.94519
				MM	NC	0.4	1.46921
				MM	NC	0.4	0.891255
				MM	NC	0.4	3.65684
				MM	NC	0.4	1.16587
				MM	NC	0.4	3.16528
				MM	NC	0.4	1.28349
				MM	NC	0.25	0.640178
				MM	NC	0.25	0.479571
				MM	NC	0.25	0.45062
				MM	NC	0.25	0.402222
				MM	NC	0.25	0.607812
				MM	NC	0.25	0.632545
				MM	NC	0.25	0.816551
				MM	NC	0.25	0.764728
				MM	NC	0	0
				MM	NC	0	0
				MM	NC	0	0
				MM	NC	0	0
				MM	NC	0	0
				MM	NC	0	0
				MM	NC	0	0
				MM	NC	0	0

## Sheet: Oral processing in vitro
Sample	Type of chewing	Mesh size	Cumulative weight of particles (%)		Sample	Chewing	d50 (mm)
M	NC	7.1	97.6669		M	NC	4
M	NC	7.1	96.7608		M	NC	4.2
M	NC	7.1	100		M	NC	3.8
M	NC	7.1	96.5307		M	NC	3.6
M	NC	7.1	97.3711		M	NC	3.7
M	NC	7.1	98.3142		M	NC	3.6
M	NC	7.1	96.7005		M	NC	4.1
M	NC	7.1	97.3847		M	NC	3.9
M	NC	6.3	90.7718		MM	NC	3.6
M	NC	6.3	88.8048		MM	NC	4.6
M	NC	6.3	93.7728		MM	NC	3.9
M	NC	6.3	91.7316		MM	NC	3.9
M	NC	6.3	89.3916		MM	NC	4.3
M	NC	6.3	95.4717		MM	NC	3.8
M	NC	6.3	95.0226		MM	NC	3.5
M	NC	6.3	90.7301		MM	NC	3.9
M	NC	4	49.2486		M	DC	6.6
M	NC	4	46.647		M	DC	6.6
M	NC	4	53.1302		M	DC	5.9
M	NC	4	56.2738		M	DC	6.7
M	NC	4	55.745		M	DC	7
M	NC	4	60.7488		M	DC	6.5
M	NC	4	47.8995		M	DC	6.8
M	NC	4	51.5648		M	DC	6.5
M	NC	2.5	18.7486		MM	DC	5.7
M	NC	2.5	20.8368		MM	DC	5.5
M	NC	2.5	22.0321		MM	DC	5.7
M	NC	2.5	32.6824		MM	DC	5.1
M	NC	2.5	19.6739		MM	DC	5.7
M	NC	2.5	21.7047		MM	DC	6.7
M	NC	2.5	16.2193		MM	DC	6.3
M	NC	2.5	25.4297		MM	DC	6.6
M	NC	2	11.501
M	NC	2	12.4211
M	NC	2	11.2197
M	NC	2	25.7051
M	NC	2	11.636
M	NC	2	11.529
M	NC	2	8.33567
M	NC	2	16.0059
M	NC	1.4	6.75356
M	NC	1.4	7.78853
M	NC	1.4	8.47781
M	NC	1.4	21.4883
M	NC	1.4	6.96513
M	NC	1.4	5.94855
M	NC	1.4	4.56113
M	NC	1.4	11.4259
M	NC	1	2.63231
M	NC	1	3.21273
M	NC	1	4.3331
M	NC	1	18.0576
M	NC	1	2.36331
M	NC	1	1.99331
M	NC	1	3.14631
M	NC	1	6.84146
M	NC	0.8	2.42126
M	NC	0.8	1.46318
M	NC	0.8	2.29894
M	NC	0.8	1.9441
M	NC	0.8	1.92517
M	NC	0.8	1.91592
M	NC	0.8	2.66108
M	NC	0.8	5.32065
M	NC	0.4	0.521824
M	NC	0.4	0.377827
M	NC	0.4	0.654294
M	NC	0.4	0.35445
M	NC	0.4	0.284129
M	NC	0.4	0.650492
M	NC	0.4	0.743162
M	NC	0.4	2.24606
M	NC	0.25	0.0695765
M	NC	0.25	0.154019
M	NC	0.25	0.188396
M	NC	0.25	0.0816309
M	NC	0.25	0.0796622
M	NC	0.25	0.209161
M	NC	0.25	0.268151
M	NC	0.25	0.485693
M	NC	0	0
M	NC	0	0
M	NC	0	0
M	NC	0	0
M	NC	0	0
M	NC	0	0
M	NC	0	0
M	NC	0	0
MM	NC	7.1	88.2258
MM	NC	7.1	81.3488
MM	NC	7.1	84.0884
MM	NC	7.1	95.4562
MM	NC	7.1	85.8824
MM	NC	7.1	92.6727
MM	NC	7.1	85.8468
MM	NC	7.1	93.4524
MM	NC	6.3	82.1233
MM	NC	6.3	70.4087
MM	NC	6.3	78.2758
MM	NC	6.3	87.9082
MM	NC	6.3	76.2399
MM	NC	6.3	86.5555
MM	NC	6.3	79.3159
MM	NC	6.3	87.0142
MM	NC	4	56.118
MM	NC	4	42.0585
MM	NC	4	51.7588
MM	NC	4	52.7731
MM	NC	4	46.5998
MM	NC	4	54.8029
MM	NC	4	57.5912
MM	NC	4	56.851
MM	NC	2.5	28.7688
MM	NC	2.5	22.2657
MM	NC	2.5	25.5857
MM	NC	2.5	20.4096
MM	NC	2.5	19.9123
MM	NC	2.5	22.454
MM	NC	2.5	25.3741
MM	NC	2.5	26.1035
MM	NC	2	20.6747
MM	NC	2	16.0788
MM	NC	2	16.4561
MM	NC	2	13.2579
MM	NC	2	12.1407
MM	NC	2	13.4292
MM	NC	2	14.5371
MM	NC	2	18.3422
MM	NC	1.4	14.1484
MM	NC	1.4	11.163
MM	NC	1.4	9.06985
MM	NC	1.4	7.83238
MM	NC	1.4	8.14764
MM	NC	1.4	7.50495
MM	NC	1.4	7.8606
MM	NC	1.4	12.7709
MM	NC	1	7.42221
MM	NC	1	5.38269
MM	NC	1	3.30746
MM	NC	1	3.81136
MM	NC	1	3.60784
MM	NC	1	2.93043
MM	NC	1	2.99022
MM	NC	1	6.60786
MM	NC	0.8	6.34368
MM	NC	0.8	4.70496
MM	NC	0.8	2.93015
MM	NC	0.8	3.26277
MM	NC	0.8	3.15571
MM	NC	0.8	2.36972
MM	NC	0.8	2.13224
MM	NC	0.8	5.3941
MM	NC	0.4	1.65053
MM	NC	0.4	0.762071
MM	NC	0.4	0.527761
MM	NC	0.4	0.519861
MM	NC	0.4	0.858131
MM	NC	0.4	0.482062
MM	NC	0.4	0.407021
MM	NC	0.4	1.1233
MM	NC	0.25	0.320458
MM	NC	0.25	0.219886
MM	NC	0.25	0.179104
MM	NC	0.25	0.14648
MM	NC	0.25	0.106113
MM	NC	0.25	0.101487
MM	NC	0.25	0.0948174
MM	NC	0.25	0.275171
MM	NC	0	0
MM	NC	0	0
MM	NC	0	0
MM	NC	0	0
MM	NC	0	0
MM	NC	0	0
MM	NC	0	0
MM	NC	0	0
M	DC	7.1	64.0204
M	DC	7.1	69.5923
M	DC	7.1	59.4131
M	DC	7.1	60.7334
M	DC	7.1	53.1774
M	DC	7.1	60.2834
M	DC	7.1	57.0693
M	DC	7.1	57.3959
M	DC	6.3	42.7482
M	DC	6.3	43.2815
M	DC	6.3	55.4814
M	DC	6.3	40.6796
M	DC	6.3	32.4818
M	DC	6.3	46.7901
M	DC	6.3	41.3553
M	DC	6.3	47.5659
M	DC	4	14.1101
M	DC	4	17.4406
M	DC	4	20.1699
M	DC	4	12.4352
M	DC	4	13.1429
M	DC	4	13.1742
M	DC	4	16.744
M	DC	4	16.5731
M	DC	2.5	3.82803
M	DC	2.5	2.48829
M	DC	2.5	6.00427
M	DC	2.5	4.56357
M	DC	2.5	2.29218
M	DC	2.5	1.84014
M	DC	2.5	3.80967
M	DC	2.5	4.97215
M	DC	2	2.5576
M	DC	2	1.01821
M	DC	2	3.59791
M	DC	2	3.12077
M	DC	2	1.65805
M	DC	2	0.931525
M	DC	2	2.48234
M	DC	2	3.26973
M	DC	1.4	1.5531
M	DC	1.4	0.646172
M	DC	1.4	2.15072
M	DC	1.4	2.43324
M	DC	1.4	1.11386
M	DC	1.4	0.536009
M	DC	1.4	1.34058
M	DC	1.4	1.8604
M	DC	1	0.749195
M	DC	1	0.421744
M	DC	1	1.10071
M	DC	1	1.32921
M	DC	1	0.479724
M	DC	1	0.235172
M	DC	1	0.469581
M	DC	1	0.802361
M	DC	0.8	0.597228
M	DC	0.8	0.352457
M	DC	0.8	0.929584
M	DC	0.8	1.04026
M	DC	0.8	0.383779
M	DC	0.8	0.219901
M	DC	0.8	0.340825
M	DC	0.8	0.636069
M	DC	0.4	0.123093
M	DC	0.4	0.10393
M	DC	0.4	0.240847
M	DC	0.4	0.227182
M	DC	0.4	0.113934
M	DC	0.4	0.08399
M	DC	0.4	0.124969
M	DC	0.4	0.118483
M	DC	0.25	0.0364719
M	DC	0.25	0.0451868
M	DC	0.25	0.0528173
M	DC	0.25	0.0538063
M	DC	0.25	0.043475
M	DC	0.25	0.0458127
M	DC	0.25	0.0586977
M	DC	0.25	0.0332585
M	DC	0	0
M	DC	0	0
M	DC	0	0
M	DC	0	0
M	DC	0	0
M	DC	0	0
M	DC	0	0
M	DC	0	0
MM	DC	7.1	64.7145
MM	DC	7.1	66.3472
MM	DC	7.1	81.1636
MM	DC	7.1	79.8481
MM	DC	7.1	71.1649
MM	DC	7.1	62.8066
MM	DC	7.1	63.3035
MM	DC	7.1	70.0525
MM	DC	6.3	57.8742
MM	DC	6.3	60.2532
MM	DC	6.3	60.0991
MM	DC	6.3	67.7823
MM	DC	6.3	57.5292
MM	DC	6.3	40.6289
MM	DC	6.3	50.1183
MM	DC	6.3	43.751
MM	DC	4	28.9921
MM	DC	4	30.6518
MM	DC	4	27.3169
MM	DC	4	33.3405
MM	DC	4	28.7819
MM	DC	4	18.1563
MM	DC	4	21.7232
MM	DC	4	20.8204
MM	DC	2.5	12.0449
MM	DC	2.5	15.1238
MM	DC	2.5	13.4681
MM	DC	2.5	16.2987
MM	DC	2.5	13.2688
MM	DC	2.5	7.22916
MM	DC	2.5	10.534
MM	DC	2.5	10.8796
MM	DC	2	7.76435
MM	DC	2	11.266
MM	DC	2	9.25211
MM	DC	2	11.7885
MM	DC	2	9.80934
MM	DC	2	4.75571
MM	DC	2	6.58436
MM	DC	2	6.54521
MM	DC	1.4	4.65511
MM	DC	1.4	7.72042
MM	DC	1.4	5.61361
MM	DC	1.4	9.00964
MM	DC	1.4	6.40572
MM	DC	1.4	2.50397
MM	DC	1.4	4.08921
MM	DC	1.4	3.63921
MM	DC	1	2.52235
MM	DC	1	3.0446
MM	DC	1	2.37371
MM	DC	1	4.15208
MM	DC	1	2.99412
MM	DC	1	0.84008
MM	DC	1	1.80455
MM	DC	1	1.2317
MM	DC	0.8	2.12277
MM	DC	0.8	2.56541
MM	DC	0.8	1.87546
MM	DC	0.8	3.50584
MM	DC	0.8	2.54208
MM	DC	0.8	0.732273
MM	DC	0.8	1.43796
MM	DC	0.8	1.10205
MM	DC	0.4	0.564407
MM	DC	0.4	0.464677
MM	DC	0.4	0.413931
MM	DC	0.4	0.484679
MM	DC	0.4	0.494589
MM	DC	0.4	0.248159
MM	DC	0.4	0.302729
MM	DC	0.4	0.34872
MM	DC	0.25	0.112382
MM	DC	0.25	0.12585
MM	DC	0.25	0.158418
MM	DC	0.25	0.118477
MM	DC	0.25	0.148908
MM	DC	0.25	0.0793296
MM	DC	0.25	0.0780474
MM	DC	0.25	0.111769
MM	DC	0	0
MM	DC	0	0
MM	DC	0	0
MM	DC	0	0
MM	DC	0	0
MM	DC	0	0
MM	DC	0	0
MM	DC	0	0

## Sheet: Mechanical properties boluses
Sample	Hardness (N)	Adhesiveness (N·s)	Cohesiveness (%)
M-NC	2.89412	-0.000647239	0.527716
M-NC	2.44057	-0.000686465	0.537871
M-NC	2.03904	-0.000411879	0.545128
M-NC	2.34191	-0.000666852	0.475777
M-DC	2.67384	-0.000686465	0.572538
M-DC	3.29259	-0.000647239	0.581361
M-DC	3.12662	-0.000608012	0.555433
M-DC	2.69832	-0.000676659	0.523457
MM-NC	6.70297	-0.297651	0.45225
MM-NC	4.03677	-0.537149	0.194574
MM-NC	5.63679	-0.214207	0.35128
MM-NC	4.05895	-0.627851	0.703308
MM-DC	4.6647	-0.223709	0.375174
MM-DC	5.44253	-0.000647239	0.4069
MM-DC	5.70717	-0.000686465	0.41279
MM-DC	5.20772	-0.236232	0.361736

## Sheet: Digestibility
Sample	Chewing	Digestion	Digestion phase	mg BSA/g	mg Tyrosine/g	mg Leucine/g	mg glucose/g
M	NC		Oral	5.55256	1.39177	5.14901	44.8519
M	NC		Oral	5.7351	1.56704	5.10504	43.5343
M	NC		Oral	5.83466	1.91133	5.21496	49.9024
M	DC		Oral	5.61733	1.54393	5.12377	46.5972
M	DC		Oral	5.62591	1.51802	5.35125	50.9603
M	DC		Oral	5.74612	1.71884	5.57874	49.006
MM	NC		Oral	5.18208	9.16364	6.05874	48.722
MM	NC		Oral	5.37772	11.7614	6.59779	54.3138
MM	NC		Oral	5.36989	10.0197	6.86731	50.0475
MM	DC		Oral	4.69579	10.7029	5.52057	46.2683
MM	DC		Oral	4.83827	10.3147	5.83515	48.7823
MM	DC		Oral	4.88577	9.86676	6.08682	51.422
M	NC	AD	Gastric	5.8956	15.7401	20.6401	57.5609
M	NC	AD	Gastric	5.96636	15.0252	24.5231	61.5735
M	NC	AD	Gastric	5.96636	14.6439	23.7198	60.3697
M	NC	OD	Gastric	7.16201	8.85602	13.4416	52.3395
M	NC	OD	Gastric	7.29746	8.2173	14.8219	58.8199
M	NC	OD	Gastric	7.22452	7.72598	15.8571	64.7488
M	DC	AD	Gastric	5.82806	12.3012	17.2824	40.1967
M	DC	AD	Gastric	5.85724	14.1355	21.0184	44.9583
M	DC	AD	Gastric	5.82806	14.0438	20.181	45.4731
M	DC	OD	Gastric	7.60112	13.8316	26.5606	73.8794
M	DC	OD	Gastric	7.53472	14.6367	29.5134	78.147
M	DC	OD	Gastric	7.43038	18.6621	30.5814	82.4146
MM	NC	AD	Gastric	5.22878	17.2269	22.0903	40.284
MM	NC	AD	Gastric	5.28341	17.141	24.5629	44.26
MM	NC	AD	Gastric	5.36535	18.3861	25.769	46.6697
MM	NC	OD	Gastric	6.24391	18.9432	19.3597	49.4767
MM	NC	OD	Gastric	6.28933	18.9432	22.7291	52.001
MM	NC	OD	Gastric	6.22574	18.6005	21.9469	49.5969
MM	DC	AD	Gastric	5.24144	13.2708	10.9901	49.9984
MM	DC	AD	Gastric	5.32811	9.45644	13.095	48.5967
MM	DC	AD	Gastric	5.40515	13.5887	13.1588	53.3117
MM	DC	OD	Gastric	5.92441	11.463	11.333	49.7764
MM	DC	OD	Gastric	6.02795	10.3089	18.0044	54.1362
MM	DC	OD	Gastric	6.04678	11.3298	17.8797	51.3958
M	NC	AD	Intestinal	16.4933	28.762	43.3297	155.263
M	NC	AD	Intestinal	17.496	25.019	54.9519	165.214
M	NC	AD	Intestinal	16.5351	27.974	45.5434	145.865
M	NC	OD	Intestinal	13.3092	19.7798	34.3498	147.694
M	NC	OD	Intestinal	14.1275	21.4045	47.7569	149.118
M	NC	OD	Intestinal	14.7304	22.0137	38.9139	136.865
M	DC	AD	Intestinal	16.4318	22.9348	43.8196	146.461
M	DC	AD	Intestinal	16.271	29.5688	36.631	143.003
M	DC	AD	Intestinal	17.3965	26.5361	43.5534	140.61
M	DC	OD	Intestinal	13.1743	20.2246	43.7343	138.86
M	DC	OD	Intestinal	13.5272	26.1404	52.3037	135.229
M	DC	OD	Intestinal	13.88	22.4431	49.9666	127.446
MM	NC	AD	Intestinal	11.2066	105.489	39.5296	141.852
MM	NC	AD	Intestinal	11.7335	98.0358	46.2598	130.149
MM	NC	AD	Intestinal	11.0561	103.359	45.0135	130.896
MM	NC	OD	Intestinal	9.87596	121.25	41.3862	154.349
MM	NC	OD	Intestinal	10.0261	110.273	47.6035	154.349
MM	NC	OD	Intestinal	9.87596	129.748	47.6035	155.591
MM	DC	AD	Intestinal	8.98707	117.579	53.6734	130.544
MM	DC	AD	Intestinal	10.3404	119.456	68.9647	133.968
MM	DC	AD	Intestinal	10.022	114.576	70.2829	122.907
MM	DC	OD	Intestinal	8.79456	113.906	55.2574	126.995
MM	DC	OD	Intestinal	9.26146	112.071	62.731	133.688
MM	DC	OD	Intestinal	8.95019	95.9258	66.5967	128.282

## Sheet: Antioxidant activity
Sample	Chewing	Digestion	Digestion phase	mg gallic acid/g	DPPH (µg Trolox/g)	FRAP (µg Trolox/g)	ABTS (mg Trolox/g)
M	NC		Oral	0.694134	38.2454	172.001	3.78187
M	NC		Oral	0.701825	30.8243	160.186	3.87509
M	NC		Oral	0.694134	37.7718	186.563	4.0499
M	DC		Oral	0.678537	37.4545	200.175	4.11872
M	DC		Oral	0.652387	42.1931	219.226	4.14284
M	DC		Oral	0.728565	41.2127	207.284	4.19107
MM	NC		Oral	0.781086	23.8596	370.829	4.14936
MM	NC		Oral	0.834969	18.7963	410.218	4.22629
MM	NC		Oral	0.820462	17.7539	451.162	4.2153
MM	DC		Oral	0.750282	19.3148	367.775	4.00831
MM	DC		Oral	0.827848	19.1642	379.833	4.04166
MM	DC		Oral	0.789065	18.411	372.493	4.1306
M	NC	AD	Gastric	1.59314	142.892	355.449	6.16463
M	NC	AD	Gastric	1.53626	91.7556	401.316	6.12914
M	NC	AD	Gastric	1.50614	131.27	345.556	5.95169
M	NC	OD	Gastric	1.03775	156.287	434.783	6.29508
M	NC	OD	Gastric	1.09639	141.91	430.148	6.24021
M	NC	OD	Gastric	1.09294	141.91	416.241	6.31338
M	DC	AD	Gastric	2.13166	198.986	534.096	6.18741
M	DC	AD	Gastric	1.95781	187.803	561.786	6.63133
M	DC	AD	Gastric	1.80327	196.749	528.039	6.59718
M	DC	OD	Gastric	1.50676	178.264	442.216	5.73062
M	DC	OD	Gastric	1.6512	159.723	445.592	6.01371
M	DC	OD	Gastric	1.56956	164.085	408.457	5.76392
MM	NC	AD	Gastric	1.66115	283.658	791.686	5.90473
MM	NC	AD	Gastric	1.79679	269.001	834.623	5.88875
MM	NC	AD	Gastric	1.80583	509.789	876.75	5.88875
MM	NC	OD	Gastric	1.86099	329.481	767.014	5.42433
MM	NC	OD	Gastric	1.89407	321.125	876.129	5.36054
MM	NC	OD	Gastric	1.82791	275.168	818.743	5.42433
MM	DC	AD	Gastric	1.47642	312.198	840.772	6.12693
MM	DC	AD	Gastric	1.48279	285.623	954.735	6.0593
MM	DC	AD	Gastric	1.50192	262.37	918.747	6.22837
MM	DC	OD	Gastric	1.08088	258.089	636.532	5.35665
MM	DC	OD	Gastric	1.07153	263.501	678.411	6.19949
MM	DC	OD	Gastric	1.08088	273.242	745.417	5.50538
M	NC	AD	Intestinal	2.49178	520.287	962.816	8.87507
M	NC	AD	Intestinal	2.61626	498.67	975.827	9.02176
M	NC	AD	Intestinal	2.7269	275.295	1042.74	9.16846
M	NC	OD	Intestinal	3.48112	498.581	921.756	11.7323
M	NC	OD	Intestinal	3.46687	399.542	871.94	11.8835
M	NC	OD	Intestinal	3.36707	394.59	935.168	12.4884
M	DC	AD	Intestinal	3.86123	602.277	1178.53	8.53915
M	DC	AD	Intestinal	3.7947	590.722	1344.84	8.46858
M	DC	AD	Intestinal	3.88785	579.167	1225.02	8.6803
M	DC	OD	Intestinal	3.70111	483.176	989.107	10.0608
M	DC	OD	Intestinal	3.72706	451.621	1071.09	10.4738
M	DC	OD	Intestinal	3.81792	474.16	943.758	9.99196
MM	NC	AD	Intestinal	2.95471	721.812	2615.52	9.05174
MM	NC	AD	Intestinal	3.17896	635.268	2701.2	7.9946
MM	NC	AD	Intestinal	3.25371	594.16	2841.41	8.12675
MM	NC	OD	Intestinal	4.01681	609.514	2846.49	11.7444
MM	NC	OD	Intestinal	4.11625	628.941	2776.55	11.6785
MM	NC	OD	Intestinal	4.12868	613.831	3079.62	11.6126
MM	DC	AD	Intestinal	3.38865	598.678	2947.61	7.82675
MM	DC	AD	Intestinal	3.54678	674.194	2807.56	7.82675
MM	DC	AD	Intestinal	3.46771	626.138	3235.95	7.6171
MM	DC	OD	Intestinal	3.87913	553.33	2273.29	10.6676
MM	DC	OD	Intestinal	3.78897	573.462	2796.73	11.2141
MM	DC	OD	Intestinal	4.12386	562.278	2659.83	10.5993
